# Supplementary material for: Daily blue-light exposure shortens lifespan and causes brain neurodegeneration in Drosophila
Source: PubMed Central journal article supplement (PMC6797782; doi:10.1038/s41514-019-0038-6), 2019-10-17
Supplement: 41514_2019_38_MOESM1_ESM.pdf [file 41514_2019_38_MOESM1_ESM.pdf]

## **SUPPLEMENTARY MATERIAL**

**Nash et al., Daily blue-light exposure shortens lifespan and causes brain neurodegeneration in *Drosophila*.**

### **LIST OF SUPPLEMENTARY MATERIAL**

**Supplementary Table 1: Fly stocks used in this study.**

**Supplementary Table 2: Light sources used in this study.**

**Supplementary Table 3: Primers used in this study.**

### **SUPPLEMENTARY FIGURES**

Supplementary Fig 1. Spectral characteristics of light used in this study.

Supplementary Fig 2. Young *w* males under B:D show increased locomotor activity compared to those in L:D.

Supplementary Fig 3. Clock mutants (*per<sup>01</sup>*) had similarly reduced median lifespan to *w<sup>1118</sup>* controls in B:D compared to D:D.

Supplementary Fig 4. Median lifespan of *sine oculis* (*so<sup>1</sup>*) mutants (which lack the retina and ocelli) was significantly reduced in B:D compared to D:D.

Supplementary Fig 5. Genetic manipulation of *cry* or *Rh7* expression does not alter lifespan of flies in B:D versus D:D compared to their respective controls.

Supplementary Table 1. Fly stocks used in this study.

| Stock                            | Genotype                                                             | Source            | Reference |
|----------------------------------|----------------------------------------------------------------------|-------------------|-----------|
| CS                               | Canton S                                                             | Paul Hardin       |           |
| <i>w</i> <sup>1118</sup> (iso31) | <i>w</i> <sup>1118</sup> ;;                                          | BDSC stock #5905  | 1         |
| <i>eya</i> <sup>2</sup>          | ; <i>eya</i> <sup>2</sup> ;                                          | BDSC stock #2285  | 2         |
| <i>so</i> <sup>1</sup>           | ; <i>so</i> <sup>1</sup> ;                                           | Doris Kretzschmar | 3         |
| <i>cry</i> <sup>02</sup>         | <i>w</i> <sup>1118</sup> ;; <i>cry</i> <sup>02</sup>                 | Jeff Hall         | 4         |
| <i>cry</i> -GFP*                 | <i>w</i> <sup>1118</sup> ; <i>cry</i> -GFP; <i>cry</i> <sup>02</sup> | Paul Hardin       | 5         |
| <i>tim</i> -Gal4                 | <i>w</i> <sup>1118</sup> ; { <i>tim</i> -Gal4};                      | Jeff Hall         | 6         |
| UAS- <i>cry</i>                  | <i>w</i> <sup>1118</sup> ; {UAS- <i>cry</i> -24};                    | Patrick Emery     | 7         |
| UAS- <i>cry</i> <sup>b</sup>     | <i>w</i> <sup>1118</sup> ; {UAS- <i>cry</i> <sup>b</sup> -31};       | Patrick Emery     | 7         |
| <i>ninaE</i> <sup>7</sup>        | ;; <i>ninaE</i> <sup>7</sup>                                         | BDSC stock #2103  | 8         |
| <i>ninaE</i> <sup>8</sup>        | <i>w</i> <sup>1118</sup> ;; <i>ninaE</i> <sup>8</sup>                | BDSC stock #2001  | 8         |
| <i>per</i> <sup>01</sup>         | <i>w</i> <sup>1118</sup> <i>per</i> <sup>01</sup> ;;                 | Jeff Hall         | 9         |
| <i>Tub</i> -GS                   | {αTub84B-Switch}10                                                   | Subhash Katewa    | 10        |
| <i>Rh7</i> <sup>1</sup>          | <i>w</i> <sup>1118</sup> ; Tl{Tl} <i>Rh7</i> <sup>1</sup> ;          | BDSC stock #76022 | 11        |
| UAS- <i>Rh7</i> **               | <i>w</i> <sup>1118</sup> ; P{UAS- <i>Rh7</i> .N}                     | BDSC stock #76027 | 11        |

\*We exchanged the *cry*<sup>03</sup> allele, originally in this stock, with *cry*<sup>02</sup>.

\*\*We removed *Rh7*<sup>1</sup> allele that was present in this stock.

Supplementary Table 2. Light sources used in this study.

| <b>Referred to as</b> | <b>Light source</b>                         | <b>Mfr. and model no.</b>                                                                          | <b>Peak wavelength(s)</b>      | <b>Photon flux density</b>                                |
|-----------------------|---------------------------------------------|----------------------------------------------------------------------------------------------------|--------------------------------|-----------------------------------------------------------|
| L:D                   | White fluorescent tubes (cool white, 4100K) | Philips F96T12/CW/VHO/EW                                                                           | 405 nm, 437 nm, 546 nm, 577 nm | 20-30 $\mu\text{mol}\cdot\text{m}^{-2}\cdot\text{s}^{-1}$ |
| B:D                   | Blue LED                                    | MarsAqua Dimmable 165W LED Aquarium Light (Channel 1)                                              | 460 nm                         | 20-30 $\mu\text{mol}\cdot\text{m}^{-2}\cdot\text{s}^{-1}$ |
| B+O:D                 | Blue LED + orange LED                       | NovoLux LED blue 40 Orange LED Masterled                                                           | 460 nm, 600 nm                 | 20-30 $\mu\text{mol}\cdot\text{m}^{-2}\cdot\text{s}^{-1}$ |
| W-B:D                 | White LEDs with yellow long-pass filter     | MarsAqua Dimmable 165W LED Aquarium Light (Channel 2); Rosco color filter #4590 CalColor 90 Yellow | 584 nm                         | 20-30 $\mu\text{mol}\cdot\text{m}^{-2}\cdot\text{s}^{-1}$ |

Supplementary Table 3. Primers used in this study.

| Gene Name                                    | Symbol                              | FlyBase ID                                                                                  | Primers (5' – 3')                                                                            |
|----------------------------------------------|-------------------------------------|---------------------------------------------------------------------------------------------|----------------------------------------------------------------------------------------------|
| Decapping protein 2                          | <i>DCP2</i>                         | FBgn0036534                                                                                 | Fwd: CCAAGGGCAAGATCAATGAG<br>Rev: GCATCGATTAGGTCCGTGAT                                       |
| Glutamate-cysteine ligase catalytic subunit  | <i>Gclc</i>                         | FBgn0040319                                                                                 | Fwd: ATGACGAGGAGAATGAGCTG<br>Rev: CCATGGACTGCAAATAGCTG                                       |
| Glutathione S transferase O1                 | <i>GstO1</i>                        | FBgn0035907                                                                                 | Fwd: AGCTGTATTTCGATGCGCTTT<br>Rev: GGTTTGTGCGGAAGATTGAT                                      |
| Thioredoxin reductase-1                      | <i>Trxr-1</i>                       | FBgn0020653                                                                                 | Fwd: AAAAGCAGGATGATGGCAAG<br>Rev: CCACAGAACGGTGTCTGATAA                                      |
| cap-n-collar                                 | <i>cncC</i><br>(isoform C)          | FBgn0262975                                                                                 | Fwd: TCGGAGATGACGAGGAGGAGAGT<br>Rev: GCATTGATGATCGCCTCCTGGT                                  |
| Glutathione S transferase D1                 | <i>GstD1</i>                        | FBgn0001149                                                                                 | Fwd: TGAAGCCGGAGTTCCTGAAGA<br>Rev: TGTCGAAGTACAGGCGCTGAT                                     |
| Glutathione S transferase D2                 | <i>GstD2</i>                        | FBgn0010038                                                                                 | Fwd: ACATTGCCATCCTGTCCACTG<br>Rev: TCCTGGAGTCACCTTCTTGGC                                     |
| Heat shock protein 23                        | <i>Hsp23</i>                        | FBgn0001224                                                                                 | Fwd: GTGTGCGAAAATCGGAAAGGA<br>Rev: ACGGAGTTGTCTGCACTTT                                       |
| Heat shock protein 68                        | <i>Hsp68</i>                        | FBgn0001230                                                                                 | Fwd: CCATCATGACCAAGATGCAC<br>Rev: ACGGTGGGACCCCTTATAACC                                      |
| Heat shock protein 70Aa, Ab, Ba, Bb, Bbb, Bc | <i>Hsp70Aa, Ab, Ba, Bb, Bbb, Bc</i> | FBgn0013275,<br>FBgn0013276,<br>FBgn0013277,<br>FBgn0013278,<br>FBgn0051354,<br>FBgn0013279 | (common to all listed Hsp70 genes)<br>Fwd: CCCACTTTCATTGGGAATTG<br>Rev: TAGTCTGCTTGCACGGAATG |
| Lactate dehydrogenase                        | <i>Ldh</i>                          | FBgn0001258                                                                                 | Fwd: CGTTTGGTCTGGAGTGAACA<br>Rev: GCAGCTCGTCCACTTCTCT                                        |

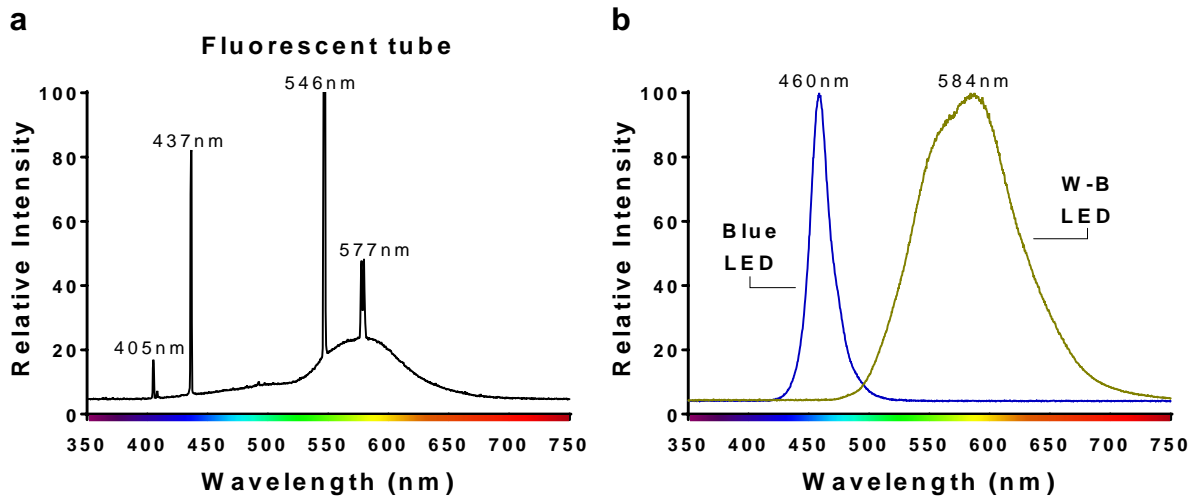

**Supplementary Fig 1.** Spectral characteristics of light used in this study.

**a** White fluorescent spectrum (used in L:D conditions). **b** Spectrum of blue LED (used in B:D conditions) with peak wavelength at 460 nm and white LED with blue light blocked by yellow filter (used in W-B:D condition) with peak wavelength at 584nm. Intensity of each light spectrum is normalized to the peak (set as 100%) of the same spectrum.

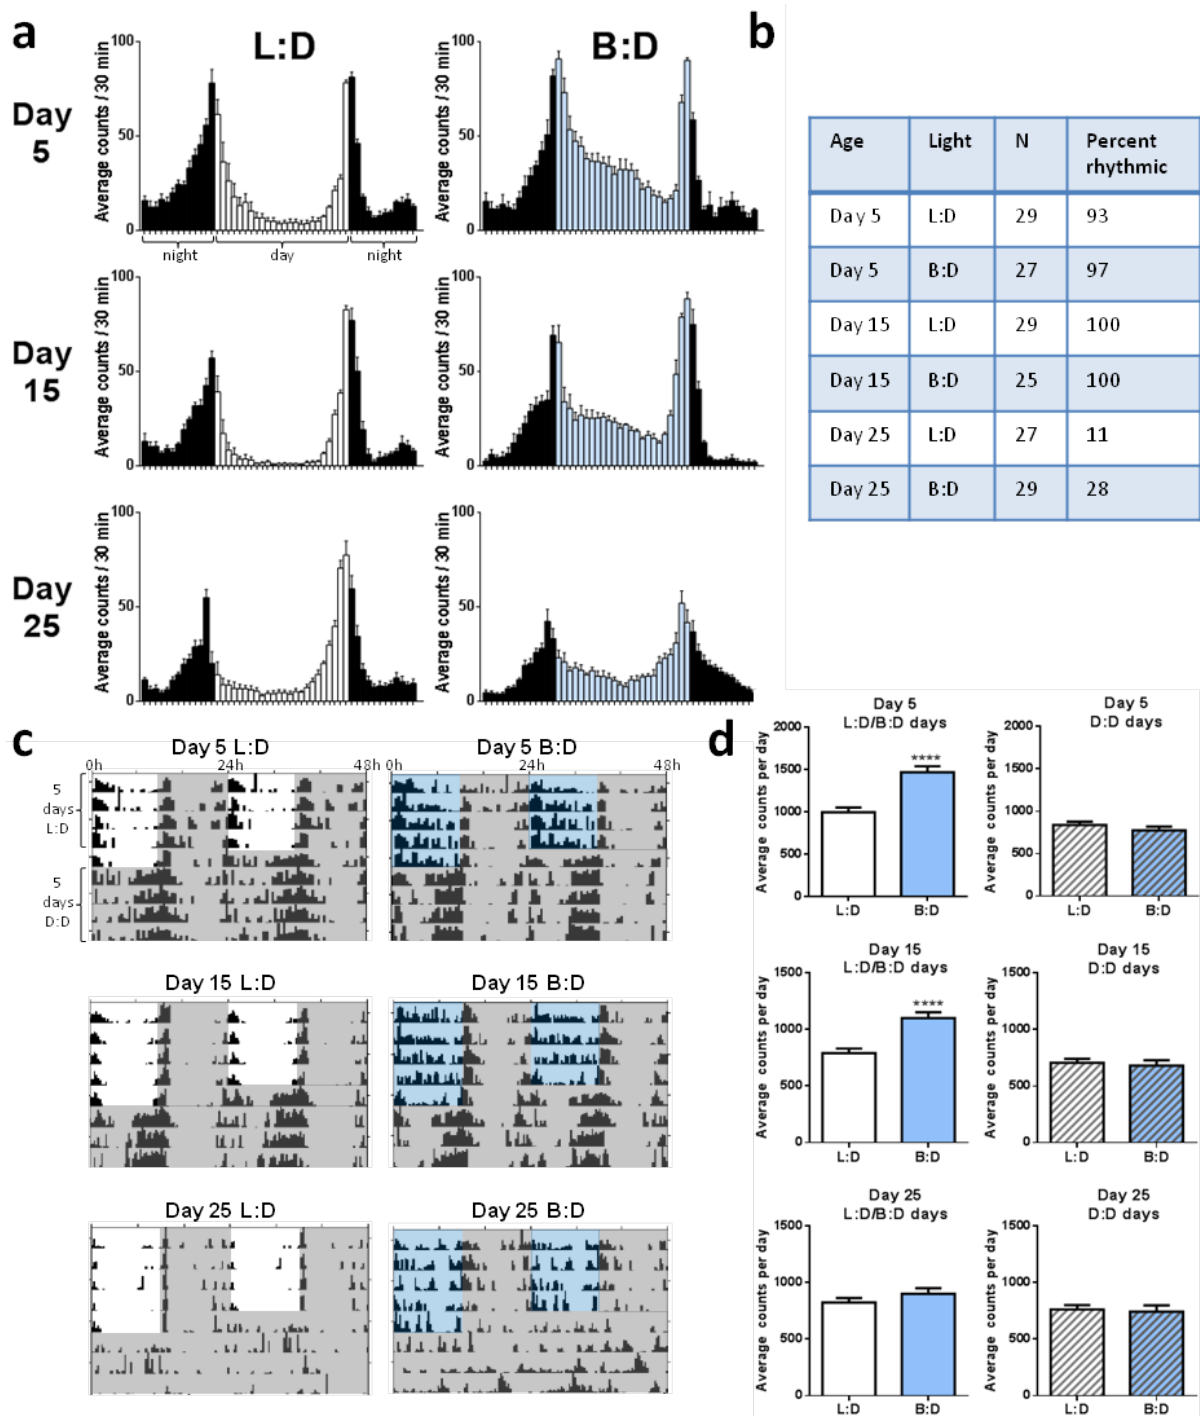

**Supplementary Fig 2.** Young *w* males under B:D show increased locomotor activity compared to those in L:D. **a** Averaged activity counts of all flies in each group, over five consecutive 24 h cycles of L:D or B:D. **b** Summary of experimental details, including percent of rhythmic calculated from D:D days. **c** Representative actograms of individual flies from each group. Gray shaded areas indicate darkness, and white or blue areas indicate white or blue light, respectively. **d** At day 5 and day 15, flies kept in B:D are significantly more active than flies kept in L:D, during the light:dark days (unpaired t-test; \*\*\*\* $p < 0.0001$ ). No significant difference in activity levels is observed between the same flies which were previously in L:D or B:D, but switched to D:D.

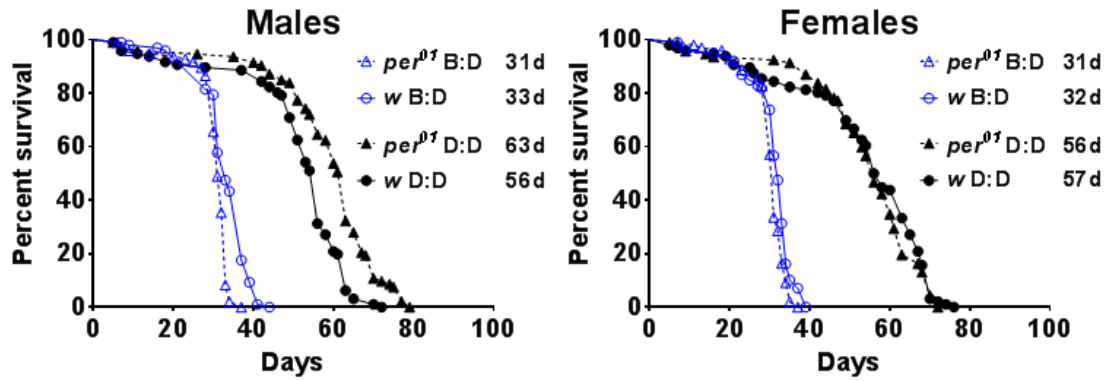

**Supplementary Fig 3.** Clock mutants ( $w^{1118}per^{01}$ ) had similarly reduced median lifespan to  $w^{1118}$  controls in B:D compared to D:D.

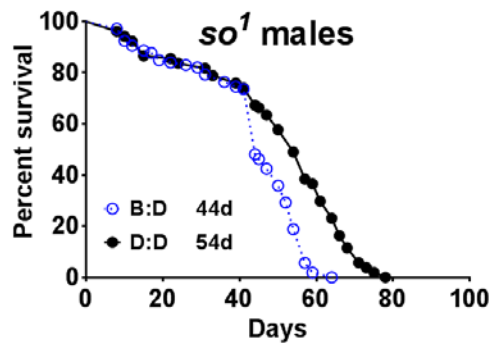

**Supplementary Fig 4.** Lifespan of *sine oculis* ( $so^1$ ) mutants, which lack the retina and ocelli, was significantly reduced in B:D compared to D:D. (Log-rank test,  $p < 0.0001$ )

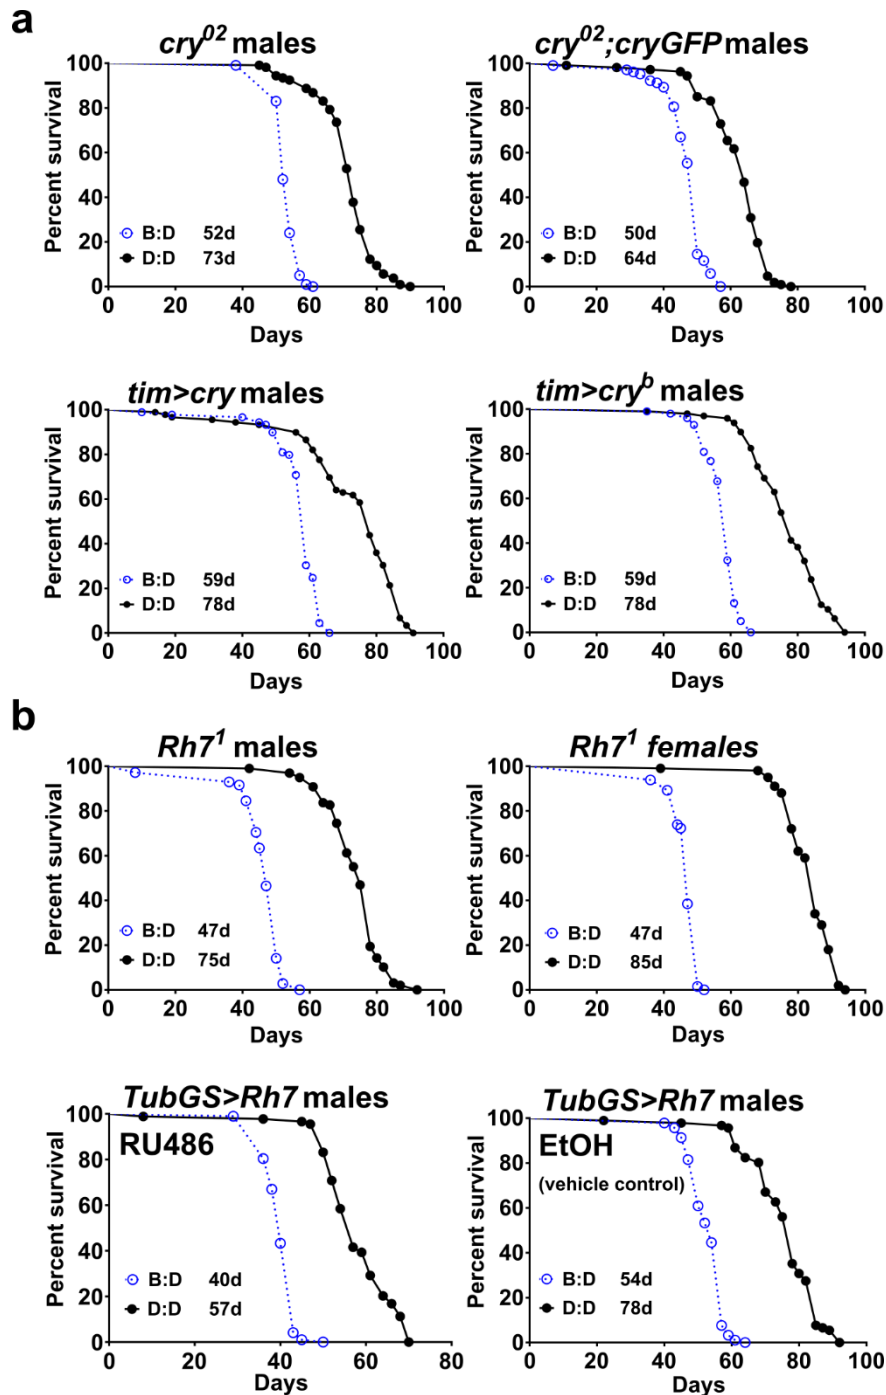

**Supplementary Fig 5.** Blue light-sensitive proteins CRY or RH7 are not involved in mediating susceptibility to blue light. **a** Mutants not expressing cryptochrome (*cry<sup>02</sup>*), or flies with elevated expression of this gene via the *tim*-Gal4>UAS-*cry* driver/responder system (left graphs) show similar lifespan differences between B:D and D:D conditions as their respective controls of a *cry* rescue line and *tim*-Gal4>UAS-*cry<sup>b</sup>* flies overexpressing a nonfunctional version of CRY (right graphs). **b** Mutants lacking Rhodopsin7 (*Rh7<sup>1</sup>*) and flies overexpressing this gene using the GeneSwitch system induced by the drug RU486 show highly reduced lifespans in B:D compared to D:D. Detailed genotypes are given in Supplementary Table 1.



## SUPPLEMENTARY REFERENCES

1. Ryder, E. *et al.* The DrosDel collection: a set of P-element insertions for generating custom chromosomal aberrations in *Drosophila melanogaster*. *Genetics* **167**, 797-813 (2004).
2. Bonini, N. M., Leiserson, W. M. & Benzer, S. The Eyes Absent Gene - Genetic-Control of Cell-Survival and Differentiation in the Developing *Drosophila* Eye. *Cell* **72**, 379-395 (1993).
3. Milani, R. Two new eye-shape mutant alleles in *Drosophila melanogaster*. *Drosophila Information Service* **14**, 52 (1941).
4. Dolezelova, E., Dolezel, D. & Hall, J. C. Rhythm defects caused by newly engineered null mutations in *Drosophila*'s cryptochrome gene. *Genetics* **177**, 329-345. (2007).
5. Agrawal, P. *et al.* *Drosophila* CRY Entrains Clocks in Body Tissues to Light and Maintains Passive Membrane Properties in a Non-clock Body Tissue Independent of Light. *Curr Biol* **27**, 2431-2441 e2433 (2017).
6. Kaneko, M. & Hall, J. C. Neuroanatomy of cells expressing clock genes in *Drosophila*: transgenic manipulation of the period and timeless genes to mark the perikarya of circadian pacemaker neurons and their projections. *J Comp Neurol* **422**, 66-94 (2000).
7. Busza, A., Emery-Le, M., Rosbash, M. & Emery, P. Roles of the two *Drosophila* CRYPTOCHROME structural domains in circadian photoreception. *Science* **304**, 1503-1506 (2004).
8. Kumar, J. P. & Ready, D. F. Rhodopsin plays an essential structural role in *Drosophila* photoreceptor development. *Development* **121**, 4359-4370 (1995).
9. Konopka, R. J. & Benzer, S. Clock mutants of *Drosophila melanogaster*. *Proc. Natl. Acad. Sci. USA* **68**, 2112-2116 (1971).
10. Sykiotis, G. P. & Bohmann, D. Keap1/Nrf2 signaling regulates oxidative stress tolerance and lifespan in *Drosophila*. *Dev Cell* **14**, 76-85 (2008).
11. Ni, J. D., Baik, L. S., Holmes, T. C. & Montell, C. A rhodopsin in the brain functions in circadian photoentrainment in *Drosophila*. *Nature* **545**, 340-344 (2017).
